# Supplementary material
Source: publisher site journal article supplement (https://www.dovepress.com/article/495784)
Supplement: Supplementary file 1 [file get_supplementary_file.php]

**Supplementary Material**

**Supplementary Tables**

**Table S1. Detailed GSE data for each group**

| GEO ID | Platform | Samples | Number of Controls | Number of Cases | Country | Year | Author |
| --- | --- | --- | --- | --- | --- | --- | --- |
| Validation set | | | | | | | |
| GSE5406 | GPL96 | 124 | 16 | 108 | USA | 2006 | Thomas Cappola |
| GSE57338 | GPL11532 | 231 | 136 | 95 | USA | 2014 | Michael Patrick Morley |
| GSE57345 | GPL9052 and GPL11532 | 195 | 134 | 61 | USA | 2014 | Michael Patrick Morley |
| GSE66360 | GPL570 | 99 | 50 | 49 | USA | 2019 | Eri Kramer |
| GSE48060 | GPL6244 | 52 | 21 | 31 | USA | 2014 | XING LI |

**Table S2. Results of Mendelian analysis of FCN2 and DEFA1 and AMI**

| FCN2 | | | | | | | | | | | | | |
| --- | --- | --- | --- | --- | --- | --- | --- | --- | --- | --- | --- | --- | --- |
| id.exposure | id.outcome | outcome | exposure | method | nsnp | b | se | pval | lo_ci | up_ci | or | or_lci95 | or_uci95 |
| 7R8VxV | HPRWf5 | myocardial infarct | FCN2 | MR Egger | 24 | 0.222780317 | 0.27571713 | 0.427739705 | -0.317625259 | 0.763185892 | 1.249546039 | 0.727875502 | 2.145099401 |
| 7R8VxV | HPRWf5 | myocardial infarct | FCN2 | Weighted median | 24 | 0.373564092 | 0.214424933 | 0.081479187 | -0.046708778 | 0.793836961 | 1.45290368 | 0.95436529 | 2.211867013 |
| 7R8VxV | HPRWf5 | myocardial infarct | FCN2 | Inverse variance weighted | 24 | 0.414916024 | 0.165595165 | 0.01222422 | 0.090349502 | 0.739482547 | 1.514243575 | 1.094556766 | 2.094851246 |
| 7R8VxV | HPRWf5 | myocardial infarct | FCN2 | Simple mode | 24 | 0.358376923 | 0.313805691 | 0.265190074 | -0.256682232 | 0.973436078 | 1.431004898 | 0.773614005 | 2.647024232 |
| 7R8VxV | HPRWf5 | myocardial infarct | FCN2 | Weighted mode | 24 | 0.422614666 | 0.21098937 | 0.057098153 | 0.009075501 | 0.83615383 | 1.525946183 | 1.009116809 | 2.307474947 |
| DEFA1 | | | | | | | | | | | | | |
| id.exposure | id.outcome | outcome | exposure | method | nsnp | b | se | pval | lo_ci | up_ci | or | or_lci95 | or_uci95 |
| 2TInbl | tFyhGW | myocardial infarct | DEFA1 | MR Egger | 5 | 0.107324221 | 0.207548526 | 0.64079125 | -0.299470889 | 0.514119331 | 1.11329515 | 0.741210299 | 1.67216523 |
| 2TInbl | tFyhGW | myocardial infarct | DEFA1 | Weighted median | 5 | 0.159222294 | 0.085304395 | 0.061968756 | -0.007974321 | 0.326418908 | 1.172598579 | 0.99205739 | 1.385995852 |
| 2TInbl | tFyhGW | myocardial infarct | DEFA1 | Inverse variance weighted | 5 | 0.164704346 | 0.072147946 | 0.022438057 | 0.023294371 | 0.306114321 | 1.179044478 | 1.023567804 | 1.358137561 |
| 2TInbl | tFyhGW | myocardial infarct | DEFA1 | Simple mode | 5 | 0.214520239 | 0.124183158 | 0.159156515 | -0.028878751 | 0.457919229 | 1.239267202 | 0.971534254 | 1.580781317 |
| 2TInbl | tFyhGW | myocardial infarct | DEFA1 | Weighted mode | 5 | 0.111332252 | 0.115227889 | 0.388662059 | -0.114514411 | 0.337178914 | 1.117766225 | 0.891799086 | 1.400989699 |
| PCOLCE | | | | | | | | | | | | | |
| id.exposure | id.outcome | outcome | exposure | method | nsnp | b | se | pval | lo_ci | up_ci | or | or_lci95 | or_uci95 |
| BhZwMv | ygeXBN | myocardial infarct | PCOLCE | MR Egger | 8 | -0.229126983 | 0.113083693 | 0.089135153 | -0.450771021 | -0.007482945 | 0.795227547 | 0.637136716 | 0.992544983 |
| BhZwMv | ygeXBN | myocardial infarct | PCOLCE | Weighted median | 8 | -0.036799831 | 0.059037413 | 0.533067236 | -0.152513161 | 0.078913498 | 0.963869053 | 0.858547595 | 1.082110714 |
| BhZwMv | ygeXBN | myocardial infarct | PCOLCE | Inverse variance weighted | 8 | 0.049420495 | 0.08061162 | 0.53983064 | -0.108578281 | 0.207419271 | 1.050662056 | 0.897108665 | 1.230498376 |
| BhZwMv | ygeXBN | myocardial infarct | PCOLCE | Simple mode | 8 | 0.0373459 | 0.143868261 | 0.802653616 | -0.244635892 | 0.319327691 | 1.038052021 | 0.782989579 | 1.376202221 |
| BhZwMv | ygeXBN | myocardial infarct | PCOLCE | Weighted mode | 8 | -0.052932291 | 0.057946048 | 0.391369159 | -0.166506544 | 0.060641963 | 0.948444229 | 0.846617277 | 1.062518425 |
| REG1A | | | | | | | | | | | | | |
| id.exposure | id.outcome | outcome | exposure | method | nsnp | b | se | pval | lo_ci | up_ci | or | or_lci95 | or_uci95 |
| 6iK2FH | 4MVZ5X | myocardial infarct | REG1A | MR Egger | 12 | -0.023801103 | 0.104743843 | 0.824821886 | -0.229099035 | 0.181496829 | 0.976479909 | 0.795249772 | 1.199010734 |
| 6iK2FH | 4MVZ5X | myocardial infarct | REG1A | Weighted median | 12 | -0.016739239 | 0.03320911 | 0.614222277 | -0.081829095 | 0.048350616 | 0.983400083 | 0.921429422 | 1.049538576 |
| 6iK2FH | 4MVZ5X | myocardial infarct | REG1A | Inverse variance weighted | 12 | 0.01869064 | 0.043076166 | 0.664362888 | -0.065738646 | 0.103119926 | 1.018866404 | 0.936375558 | 1.108624355 |
| 6iK2FH | 4MVZ5X | myocardial infarct | REG1A | Simple mode | 12 | -0.028328392 | 0.04603137 | 0.55080087 | -0.118549876 | 0.061893093 | 0.972069095 | 0.888207514 | 1.063848606 |
| 6iK2FH | 4MVZ5X | myocardial infarct | REG1A | Weighted mode | 12 | -0.031691304 | 0.035598424 | 0.392389219 | -0.101464215 | 0.038081606 | 0.968805602 | 0.903513511 | 1.038816003 |
| CRTAC1 | | | | | | | | | | | | | |
| id.exposure | id.outcome | outcome | exposure | method | nsnp | b | se | pval | lo_ci | up_ci | or | or_lci95 | or_uci95 |
| hq66cj | TF2COk | myocardial infarct | CRTAC1 | MR Egger | 13 | -0.040219166 | 0.040153466 | 0.338044144 | -0.118919959 | 0.038481627 | 0.96057889 | 0.887878865 | 1.039231635 |
| hq66cj | TF2COk | myocardial infarct | CRTAC1 | Weighted median | 13 | -0.021414078 | 0.027126855 | 0.429875264 | -0.074582713 | 0.031754557 | 0.978813576 | 0.928130702 | 1.032264112 |
| hq66cj | TF2COk | myocardial infarct | CRTAC1 | Inverse variance weighted | 13 | -0.001210116 | 0.020427105 | 0.952760381 | -0.041247243 | 0.03882701 | 0.998790616 | 0.959591848 | 1.03959063 |
| hq66cj | TF2COk | myocardial infarct | CRTAC1 | Simple mode | 13 | 0.09214079 | 0.053121168 | 0.108409069 | -0.011976699 | 0.196258279 | 1.09651919 | 0.988094736 | 1.216841149 |
| hq66cj | TF2COk | myocardial infarct | CRTAC1 | Weighted mode | 13 | -0.009146978 | 0.02357506 | 0.704815502 | -0.055354095 | 0.037060139 | 0.990894728 | 0.946150061 | 1.037755428 |
